# Supplementary material for: Leaf-damaging behavior by queens is widespread among bumblebee species
Source: Springer Nature journal article supplement (doi:10.1038/s42003-025-07670-3), 2025-03-14
Supplement: MOESM1 [file 42003_2025_7670_MOESM1_ESM.pdf]

## Supplementary Material

### Leaf-damaging behavior by queens is widespread among bumblebee species

Priska Flury<sup>1</sup>, Sofie Stade<sup>1</sup>, Consuelo M. De Moraes<sup>1</sup> †, Mark C. Mescher<sup>1</sup> †

<sup>1</sup>Department of Environmental Systems Sciences, ETH Zürich, Zürich, Switzerland.

† Corresponding authors. Email: mescher@usys.ethz.ch;

consuelo.demoraes@usys.ethz.ch

**Supplementary figure 1:** Leaf damage of wild *Bombus pratorum* queens and workers.

**Supplementary figure 2:** Pictures of field site in Swiss Alps.

**Supplementary table 1:** Summary statistics.

**a** *Bombus pratorum* queen damage

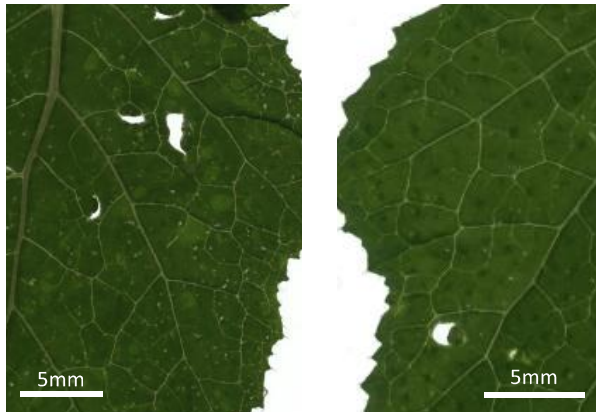

**b** *Bombus pratorum* worker damage

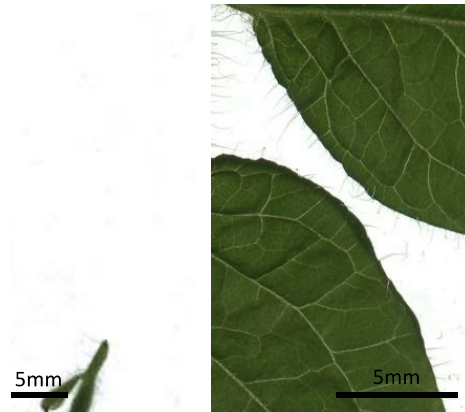

**Fig.S1.: Leaf damage of wild *Bombus pratorum* queens and workers.**

**a**, Typical leaf damage of a *B.pratorum* queen on *Brassica nigra*. **b**, Typical leaf damage of a *B.pratorum* worker on *Solanum lycopersicum*. Scale bar=5mm.

**a**

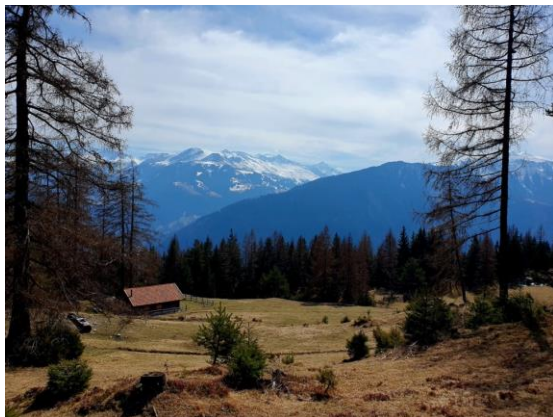

**b**

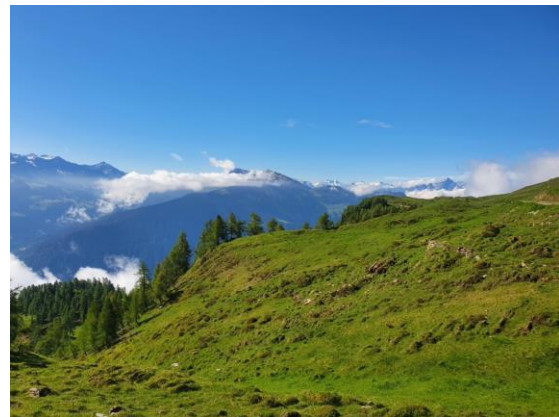

**Fig.S2.: Wild queen collection sites.**

In Spring 2023 (end of February 2023 until end of July 2023) we collected wild bumblebee queens at different locations in Switzerland. Many of our collections happened at a field site in the Swiss mountains mainly because the delayed phenology at higher elevation shifted the timing of queen emergence to mid-April/mid-May at 1400m and mid-July for 2000m. **a**, Sampling site in Haldenstein, Switzerland (Calanda mountain, 1400m) **b**, Sampling site in Haldenstein, Switzerland (Calanda mountain, 2000m).

|                                                       |                       |                             |
|-------------------------------------------------------|-----------------------|-----------------------------|
| plant species                                         | <i>Brassica nigra</i> | <i>Solanum lycopersicum</i> |
| biological replicates per treatment                   | 8                     | 7                           |
| mean <i>duf</i> queen                                 | 17.6±7.2              | 20.86±3.13                  |
| mean <i>duf</i> mechanical                            | 34.38 ±14.8           | 25.57±6.24                  |
| <b>Exact Wilcoxon-Mann-Whitney Test wilcox_test()</b> |                       |                             |
| Z-value                                               | 2.1145                | 2.1891                      |
| p-value                                               | 0.03419               | 0.02972                     |
| <b>Package <i>rstatix</i> dunn_test ()</b>            |                       |                             |
| statistic                                             | -2.11                 | -2.19                       |
| p.adjusted                                            | 0.0345                | 0.0286                      |

#### Supplementary Table 1: Summary statistics.

For both plant species, the mean days until flowering (*duf*) was calculated for both treatments (queen= plants damaged by unmated queens, mechanical= mechanical replication of the damage). Statistical significance was determined by exact Wilcoxon-Mann-Whitney test using the function `wilcox_test` from the R package *coin*. The Z- and p-value are shown in the table. For visualization, we used the function `stat_pvalue_manual()` from the package *rstatix* and the p-values for this were calculated using the function `dunn_test()` also from the package *rstatix*. Also here the relevant statistics and adjusted p-values are shown in the table. The R-code can be found in the online repository on figshare (see code availability).
